# Supplementary material for: The effect of clinician-patient alliance and communication on treatment adherence in mental health care: a systematic review
Source: PubMed Central journal article supplement (PMC3528426; doi:10.1186/1471-244x-12-87), 2012-07-24
Supplement: 1471-244X-12-87-S1.pdf [file 1471-244X-12-87-S1.pdf]

**Table 4. Characteristics of Included Studies**

| Author                              | Sample & Setting                                                                                                                                                                     | Study Design                                        | Measure of Adherence & Rater                                                                                 | Measure of Alliance/Communication & Rater                                         | Findings                                                                                                                                                                                                                                                                                       |
|-------------------------------------|--------------------------------------------------------------------------------------------------------------------------------------------------------------------------------------|-----------------------------------------------------|--------------------------------------------------------------------------------------------------------------|-----------------------------------------------------------------------------------|------------------------------------------------------------------------------------------------------------------------------------------------------------------------------------------------------------------------------------------------------------------------------------------------|
| <b>Sajatovic et. al (2006) [19]</b> | 323 Veteran inpatients with a diagnosis of Bipolar disorder                                                                                                                          | Cross-sectional design                              | Patient self-report interview                                                                                | The Working Alliance Inventory (WAI), patient & clinician version                 | No significant difference was found between full adherers and those reporting substantial nonadherence on WA scores from both patient and clinician report (p= 0.241)                                                                                                                          |
| <b>Weiss et. al (2002) [21]</b>     | 162 outpatients with schizophrenia (47.5%), schizoaffective disorder (45%) or other psychotic disorders (7.5%)                                                                       | Cross-sectional and longitudinal prospective design | Therapist self-report                                                                                        | The Working Alliance Inventory, Short form, therapist version                     | Adherence difficulties were significantly associated with weaker WA (p=0.30). WA also predicted the length of time adherence was maintained (p <0.001) and the length of time it took patients to develop active adherence (p< 0.05)                                                           |
| <b>Corriss et. al (1999) [22]</b>   | 87 outpatients with schizoaffective disorder (48%) schizophrenia, paranoid type (38%), schizophrenia, undifferentiated type (12%) or affective disorder with psychotic features (2%) | Cross-sectional design                              | Therapist self-report                                                                                        | The Working Alliance Inventory, Short form, therapist version                     | Low agreement regarding the tasks of treatment were associated with with poor adherence (p<0.05) For adherence to non medication all three alliance variables were associated with poor adherence. (p < 0.05).                                                                                 |
| <b>Lecomte et. al (2008) [20]</b>   | 1118 patients from early intervention psychosis services with schizophrenia (56%), schizoaffective disorder (11%), bipolar disorder (10%) or psychosis NOS (10%)                     | Cross-sectional design                              | Patient self report- assessed with a combination of the MAS/MCS . Dosage frequency also assessed.            | The Working Alliance Inventory, Patient version (Hovarth et al 1989)              | Alliance did not emerge as a predictor of adherence (F= 1.22 (df 2,100) n.s.)                                                                                                                                                                                                                  |
| <b>Startup et. al (2006) [23]</b>   | 29 patients from a controlled CBT trial with schizophrenia (n=25), schizophreniform (n=4) or schizoaffective disorder (n=1)                                                          | Not stated (observational)                          | Premature termination of therapy (those who leave before session 12 considered 'drop outs', others stay ins' | Working Alliance Inventory, Observer version and the Active Engagement (AE) Scale | Stay ins were significantly more engaged with treatment as per the AE scale (p =0.01) and showed significantly more agreement on the goals (p=0.05) and tasks (p=0.04) of treatment, but did not differ significantly on the bond subscale (p= 0.08)                                           |
| <b>Olfson et. al (2000) [26]</b>    | 213 inpatients with schizophrenia or schizoaffective disorder                                                                                                                        | Not stated (longitudinal prospective design)        | Patient self-report interview at 3 month follow up post-discharge.                                           | The Active Engagement Scale                                                       | Noncompliant patients received significantly poorer mean scores on 4/6 of the AES subscales: optimism about usefulness of treatment (p=0.006), meaningful involvement in therapy (p=0.09) interest in understanding their illness (p=0.015), realistic perceptions of the therapist (p=0.004). |

|                                     |                                                                                                                  |                                                                  |                                                                                                                                                                    |                                                         |                                                                                                                                                                                                                                                                                                                                                                                                  |
|-------------------------------------|------------------------------------------------------------------------------------------------------------------|------------------------------------------------------------------|--------------------------------------------------------------------------------------------------------------------------------------------------------------------|---------------------------------------------------------|--------------------------------------------------------------------------------------------------------------------------------------------------------------------------------------------------------------------------------------------------------------------------------------------------------------------------------------------------------------------------------------------------|
| <b>Frank et. al (1990) [25]</b>     | 143 hospital patients with schizophrenia                                                                         | Not stated (longitudinal prospective)                            | Therapist reports, patient reports and medical records of psychotherapy utilisation and medication compliance for a two year period or until patients dropped out. | The Active Engagement Scale, therapist rated            | The more actively engaged in therapy the patients became, the more likely they were to take their medication as prescribed ( $r = .37$ , $df = 70$ , $p < .01$ )                                                                                                                                                                                                                                 |
| <b>Zeber et. al (2008) [27]</b>     | 435 Veterans inpatient/outpatients with bipolar disorder, cyclothymia or shizoaffective disorder-bipolar subtype | Cross-sectional design                                           | Patient self report: 1) patient report of no. of days within the past 4 dose has been missed. 2) Morisky scale:                                                    | Health Care Climate Questionnaire (HCCQ), patient rated | The overall HCCQ score demonstrated a significantly positive relationship with adherence outcome 1) ((OR 1.03, 95% CI 1.01-1.03, $p = 0.022$ ), but not 2). For the individual HCCQ items 4 items were statistically significant in relation to outcome 1) and 5 in relation to outcome 2)                                                                                                       |
| <b>Perron et. al (2009) [28]</b>    | 429 Veterans inpatient/outpatients with bipolar disorder, cyclothymia or shizoaffective disorder-bipolar subtype | Not stated (Cross-sectional and longitudinal prospective design) | Patient Self rept: Morisky Scale administered at baseline and 1 year-follow up.                                                                                    | Health Care Climate Questionnaire, patient rated        | Medication adherence exhibited a significant association, but a small effect size with therapeutic alliance at baseline ( $p = 0.15$ , $p = 0.011$ ), but not follow-up ( $p = 0.02$ , $p = 0.799$ )                                                                                                                                                                                             |
| <b>Shigemura et. al (2010) [12]</b> | 1151 individuals with major depressive disorder participating in an internet based survey                        | Not stated (Cross sectional design)                              | Patient self-report                                                                                                                                                | 1 item patient-rated scale                              | Low adherence was associated with a neutral/negative doctor-patient relationship ( $P < 0.001$ ) and in a multivariate model low adherence was predicted by neutral/negative doctor-patient relationship ( $p = 0.020$ )                                                                                                                                                                         |
| <b>Yeh et al (2008) [31]</b>        | 401 outpatients with major depression or depressive disorder                                                     | Cross-sectional design                                           | Patient self-report                                                                                                                                                | Patient-rated questionnaire                             | The professional-patient interaction was a significantly correlated with medication adherence ( $p < 0.05$ ), however did not emerge as a significant predictor of adherence.                                                                                                                                                                                                                    |
| <b>Bull et. al (2011) [42]</b>      | 181 outpatients with major depression or dysthymic disorder                                                      | Not stated (Cross-sectional design)                              | Patient self-report                                                                                                                                                | Patient & physician questionnaire                       | Patients who reported they were told to take their medication for less than 6 months had higher odds of discontinuing antidepressant therapy than patients who reported being told to take their medication for more than 6 months (OR 3.12 95% CI 1.21-8.07). Communication regarding adverse effects significantly decreased the odds discontinuing antidepressant (OR 0.49 95% CI 0.25-0.95). |
| <b>Lin et. al (1995) [43]</b>       | 155 primary care patients with major depression, minor depression or dysthymia                                   | Observational cohort (longitudinal)                              | Patient self-report (early and late phase adherence - 1 & 3 months)                                                                                                | Patient rated questionnaire                             | Patients reporting having received more educational messages regarding medications and discussions of behavioural strategies were more likely to adhere to their antidepressants ( $p = 0.008$ .)                                                                                                                                                                                                |

**Table 4. Characteristics of Included Studies**

|                                     |                                                                                                                                  |                                              |                                                                                                                                                                                                                                                          |                                                                                                            |                                                                                                                                                                                                                                                                                                                                                                     |
|-------------------------------------|----------------------------------------------------------------------------------------------------------------------------------|----------------------------------------------|----------------------------------------------------------------------------------------------------------------------------------------------------------------------------------------------------------------------------------------------------------|------------------------------------------------------------------------------------------------------------|---------------------------------------------------------------------------------------------------------------------------------------------------------------------------------------------------------------------------------------------------------------------------------------------------------------------------------------------------------------------|
| <b>Lin et. al (1995) [43]</b>       | 155 primary care patients with major depression, minor depression or dysthymia                                                   | Obersvational cohort (longitudinal)          | Patient self-report (early and late phase adherence – 1 & 3 months)                                                                                                                                                                                      | Patient rated questionnaire                                                                                | Patients reporting having received more educational messages regarding medications and discussions of behavioural strategies were more likely to adhere to their antidepressants (p= 0.008.)                                                                                                                                                                        |
| <b>Gonzalez et. al (2004) [32]</b>  | 95 veteran outpatients with depression (or with comorbity) 2 groups: newly prescribed antidepressants or newly referred to clini | Prospective cohort study (longitudinal)      | Short term adherence (1 month) assessed by pharmacy records (med group), chart notes (referral group). Intermediete adherence (6 months): medication possession ratio, chart notes                                                                       | Patient rated participatory decision making style and patient-rated..questionnaire                         | Provider participatory decision making style was significantly associated with adherence at 6 months (p=0.03), but not 1 month in both groups. Those with a mental health referral reporting that their doctor had more characteristics of a participatory decision making style were more likely to attend their initial appointment (p=0.04)                      |
| <b>Bultman et. al (2000) [40]</b>   | 100 patients from community pharmacies receiving antidepressants.                                                                | Not stated (prospective observational)       | Patient self report adapted from the Brief Medication Questionnaire (BMQ) at 2 month follow up.                                                                                                                                                          | Patient-rated scales at baseline and follow-up (2 months)                                                  | Physician initial communication style was positively correlated with medication adherence (p <0.05) as was the physician's follow up style (p<0.001). Collaborative communication style predicted follow up communication style (p<0.02), more positive initial beliefs about the antidepressant by the client (p<0.0004) and better medication adherence (p<0.03). |
| <b>Madsen et. al (2009) [34]</b>    | 50 veterab outpatients with major depressive disorder                                                                            | Not stated (longitudinal prospective design) | Patient self-report based on the Anti-depressant Questionnaire and Proportion of Days Adherent calculated                                                                                                                                                | Physician Assessment Questionnaire, patient-rated                                                          | Associations between the 6-item PAQ collaboration subscale and adherence at 3, 6, 9 and 12-week postbaseline, were not statistically significant (all ps> .10)                                                                                                                                                                                                      |
| <b>Mahone, I. et al (2008) [35]</b> | 85 patients community mental health centre                                                                                       | Cross-sectional correlational                | Patient self-report using the Schizophrenia Outcomes Module Medication (SCHIZOM) Use questionnaire.                                                                                                                                                      | Participation preferences and actual participation were measured using the Control preferences scale (CPS) | Neither client participation, SDM oreference nor preference-participation agreement was found to be be associated with better rates of medication adherence for the past month or past 6 months.                                                                                                                                                                    |
| <b>Hamann (2006) [36]</b>           | 107 psychiatric state hospital inpateints with a diagnosis of schizoprhenia (ICD-10)                                             | Cluster-randomized control trial             | Composite measure of adherence consisting of the MARS questionnaire (patient-rated ,derived from DAI and Maedication Adherence Questionnaire (MAQ)), doctor rating of compliance and plasma levels of antipsychotics at 6 month and 18 month follow up . | Intervention: A decision aid and planning worked talk was compared to routine care                         | No significant effects of the intervention on adherence                                                                                                                                                                                                                                                                                                             |
| <b>Loh (2007)[33]</b>               | 207 patients diagnosed with                                                                                                      | Survey study and                             | GP- and patient rated at 6-8 weeks post                                                                                                                                                                                                                  | Patient participation scale.                                                                               | Patient participation was positively correlated with adherence measures                                                                                                                                                                                                                                                                                             |

|                                    |                                                                                                                 |                                        |                                                                                              |                                                                                                                                                                                               |                                                                                                                                                                                                                                                                                                                                                                                                                                                                                                         |
|------------------------------------|-----------------------------------------------------------------------------------------------------------------|----------------------------------------|----------------------------------------------------------------------------------------------|-----------------------------------------------------------------------------------------------------------------------------------------------------------------------------------------------|---------------------------------------------------------------------------------------------------------------------------------------------------------------------------------------------------------------------------------------------------------------------------------------------------------------------------------------------------------------------------------------------------------------------------------------------------------------------------------------------------------|
| <b>Loh (2007) [36]</b>             | 23 primary care physicians treating 405 patients with newly diagnosed depression                                | A cluster randomized control trial     | Patient and provider report.                                                                 | Intervention: physician training and a decision board for use during the consultation                                                                                                         | No significant effects of the intervention on adherence                                                                                                                                                                                                                                                                                                                                                                                                                                                 |
| <b>Ludmen et al (2003) [37]</b>    | 386 primary care patients receiving antidepressant for depression (receiving a new antidepressant prescription) | Randomised trial                       | Patient self-report.                                                                         | Intervention: education about depression, shared decision making regarding the use of maintenance pharmacotherapy, two visits and a telephone contact with a depression prevention specialist | Intervention patients were significantly more likely to refill antidepressant medication prescriptions than usual care patients during the 1 year follow up period (adjusted odds ratio intervention: control= 1.91, 95% CI (1.37, 2.65) P<0.001) Intervention patients were also more likely to receive adequate dosage of antidepressant treatment compared to usual care patients during the 1-year follow-up period (adjusted odds ratio intervention: control = 2.08, 95% CI (1.14-3.06), P<0.001) |
| <b>Von Korff et al (2003) [38]</b> |                                                                                                                 |                                        |                                                                                              |                                                                                                                                                                                               |                                                                                                                                                                                                                                                                                                                                                                                                                                                                                                         |
| <b>Sleath et. al (2003) [43]</b>   | 27 resident physicians with 6-21 patients with depression in general internal medicine and family practice      | Not stated (prospective observational) | Pharmacy refill records used to calculate adherence for the 100 day period post consultation | Researchers coded for specific communication variables in audio-taped transcripts relating to discussions surrounding medication                                                              | Question asking about antidepressant adherence was related to adherence (p=0.03).                                                                                                                                                                                                                                                                                                                                                                                                                       |
